# Supplementary material for: Bi2S3@NH2-UiO-66-S composites modulated by covalent interfacial reactions boost photodegradation and the oxidative coupling of primary amines
Source: Royal Society of Chemistry journal article supplement (doi:10.1039/d1nj01427g), 2021-01-01
Supplement: d1nj01427g4.pdf [file d1nj01427g4.pdf]

## Supporting Information

### **Bi<sub>2</sub>S<sub>3</sub>@NH<sub>2</sub>-UiO-66 Composites Modulated by Covalent Interfacial Reactions with Boosting Photodegradation and Oxidative Coupling of Primary Amine**

Hang Wang<sup>a</sup>, Qing Zhang<sup>a</sup>, Qing Liu<sup>a</sup>, Na Zhang<sup>\*,a</sup>, Jian-Yong Zhang<sup>a</sup>, Yong-Zheng Fang<sup>a</sup>

<sup>a</sup>Shanghai Institute of Technology, Shanghai 201418 (P. R. China). E-mail: nzhang@sit.edu.cn

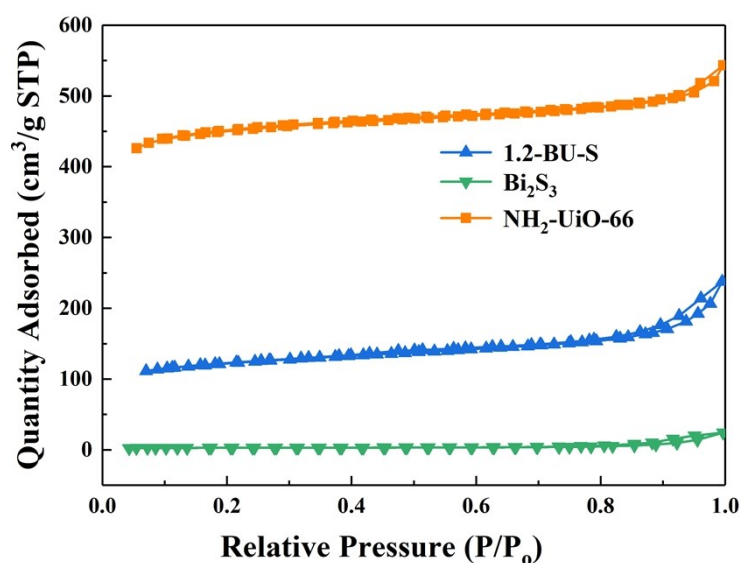

Figure S1. The N<sub>2</sub> adsorption-desorption isotherms obtained at 77 K.

Table S1 The S<sub>BET</sub> and pore volume data obtained for the various samples.

| Samples                        | S <sub>BET</sub> (m <sup>2</sup> g <sup>-1</sup> ) | V <sub>t</sub> (cm <sup>3</sup> g <sup>-1</sup> ) |
|--------------------------------|----------------------------------------------------|---------------------------------------------------|
| Bi <sub>2</sub> S <sub>3</sub> | 9.1                                                | 0.003                                             |
| NH <sub>2</sub> -UiO-66        | 1377.6                                             | 0.642                                             |
| 1.2-BU-S                       | 383.5                                              | 0.166                                             |

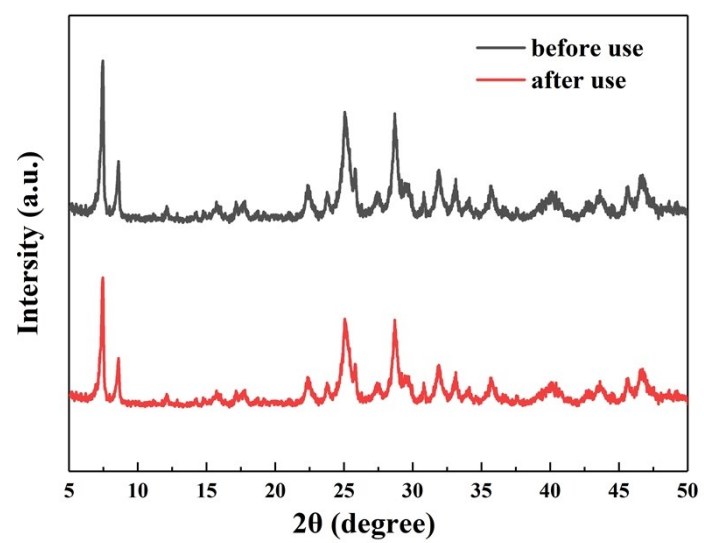

Figure S2. The PXRD patterns of the 1.2-BU-S before and after 5 cycles.
