# Supplementary figures and images for: Bi2S3@NH2-UiO-66-S composites modulated by covalent interfacial reactions boost photodegradation and the oxidative coupling of primary amines
Source: Royal Society of Chemistry journal article supplement (doi:10.1039/d1nj01427g), 2021-01-01

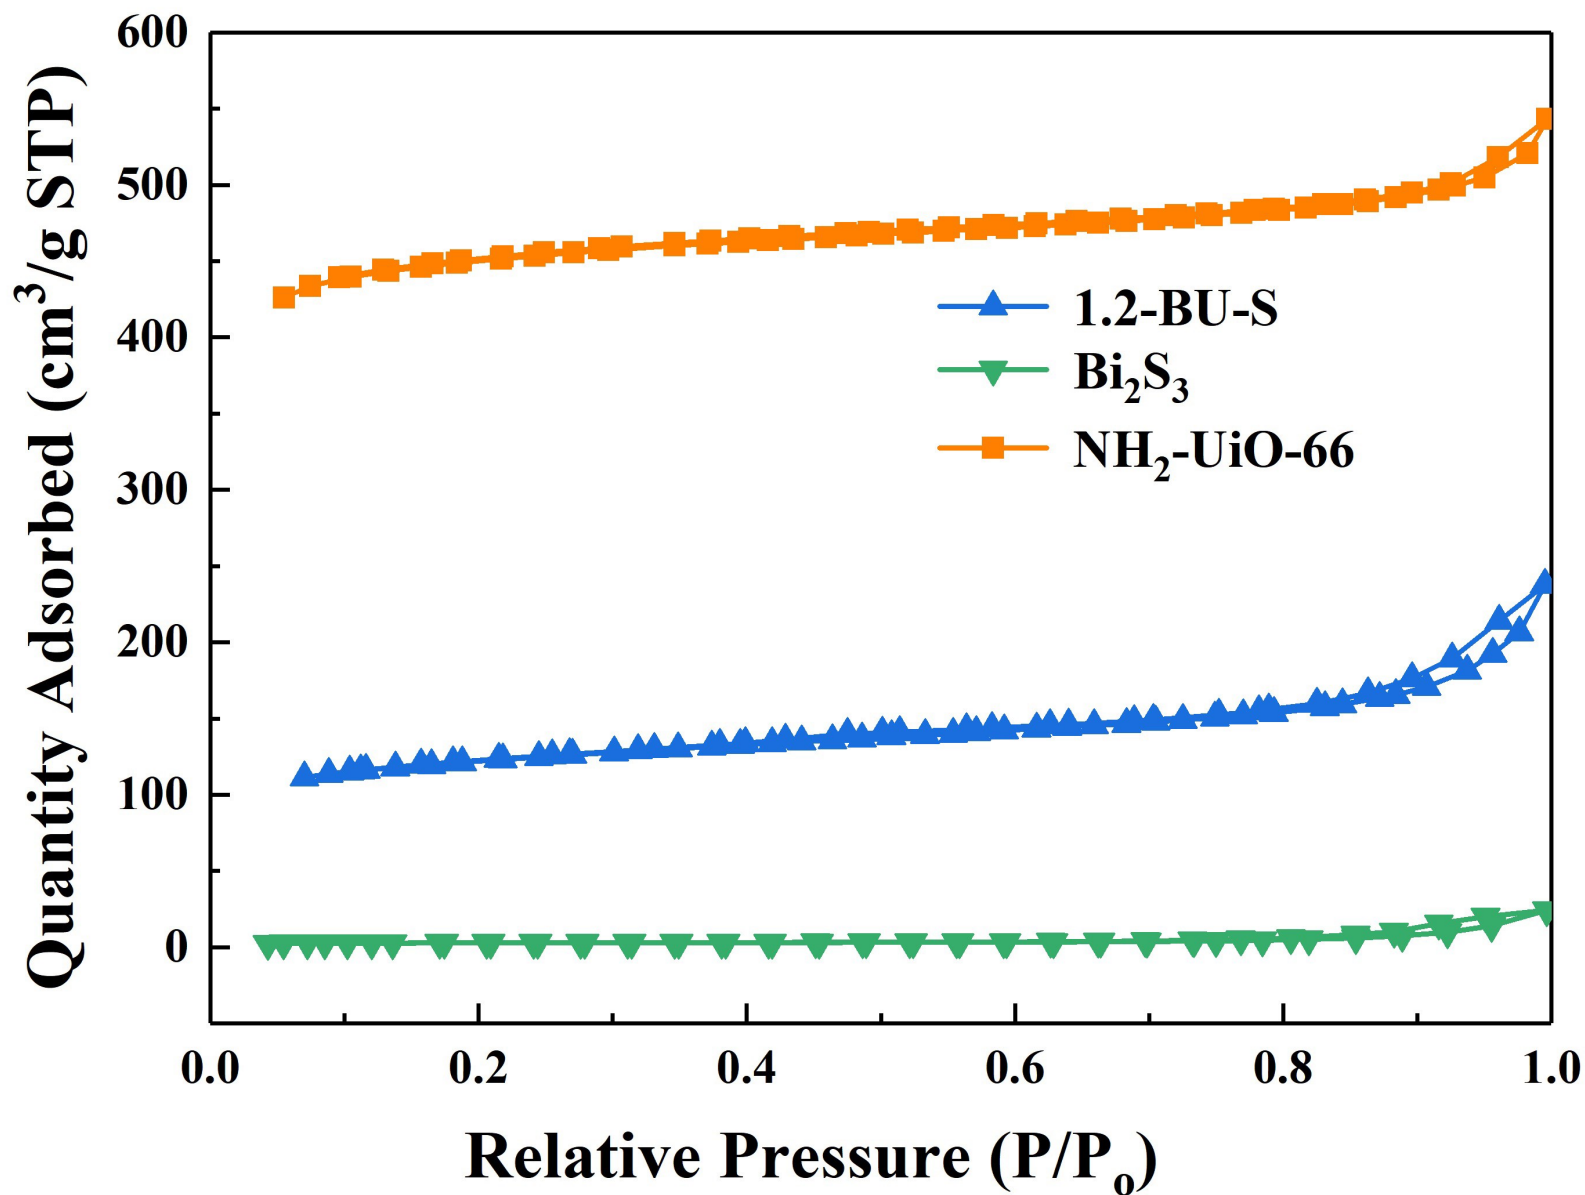

Supplement: d1nj01427g2.pdf [file d1nj01427g2.pdf]

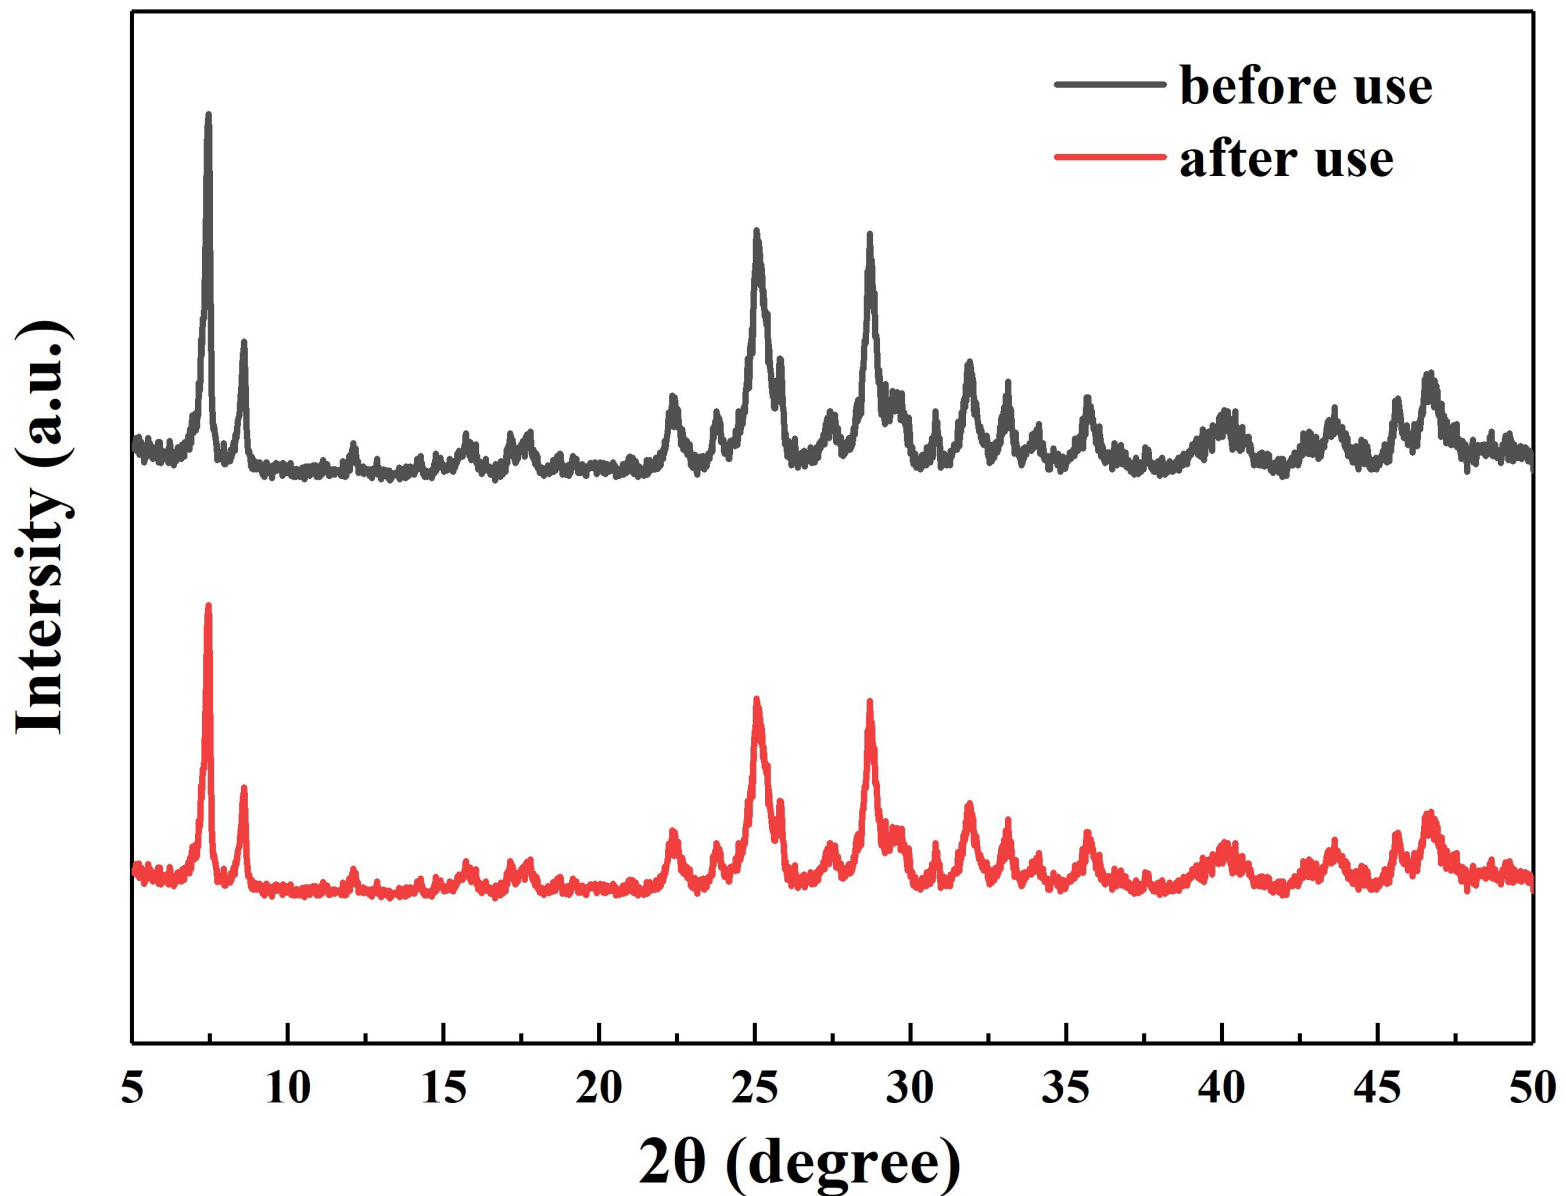

Supplement: d1nj01427g3.pdf [file d1nj01427g3.pdf]
